# Supplementary material
Source: publisher site journal article supplement (https://www.dovepress.com/article/357319)
Supplement: Supplementary file 1 [file get_supplementary_file.php]

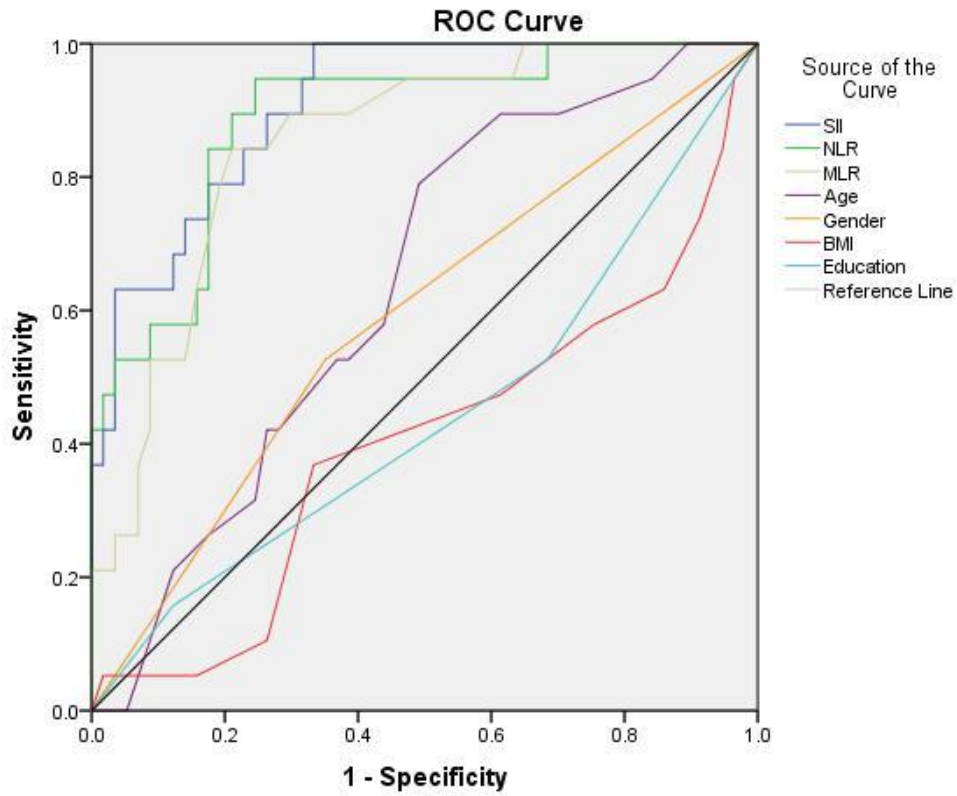

Figure S1. Receiver operating characteristic (ROC) curve for systemic immune-inflammation index, age, sex, education and BMI as a predictor of POCD.
